# Supplementary material for: Low-temperature purification of phosphine (PH 3 ) using CuO@NC sorbents: simultaneous pollutant removal and Cu 3 P resource recovery
Source: Royal Society of Chemistry journal article supplement (doi:10.1039/d5gc04734j), 2025-12-03
Supplement: d5gc04734j1.pdf [file d5gc04734j1.pdf]

1 **Supporting Information**

2 **Low-Temperature Purification of Phosphine (PH<sub>3</sub>) Using**  
3 **CuO@NC Sorbents: Simultaneous Pollutant Removal and Cu<sub>3</sub>P**  
4 **Resource Recovery**

5 Zhongxian Wang<sup>a</sup>, Jiuyang He<sup>c</sup>, Jiayu Feng<sup>d</sup>, Chaoyang Peng<sup>b</sup>, Can Niu<sup>e</sup>, Yixing Ma<sup>a</sup>, Xin Sun<sup>a</sup>,  
6 Fei Wang<sup>a\*</sup>, Lian Wang<sup>b\*</sup>, Ping Ning<sup>a</sup>, Kai Li<sup>a\*</sup>

7 **Affiliations:**

8 a Faculty of Environmental Science and Engineering, Kunming University of Science and  
9 Technology, Kunming 650500, China.

10 b Laboratory of Atmospheric Environment and Pollution Control, Research Center for Eco-  
11 Environmental Sciences, Chinese Academy of Sciences, Beijing 100085, China

12 c Experimental Center of Advanced Materials, School of Materials Science & Engineering, Beijing  
13 Institute of Technology, Beijing 100081, China

14 d School of Chemistry and Environment, Yunnan Minzu University, Kunming, Yunnan 650504,  
15 China

16 e Key Laboratory of Public Health Safety of Hebei Province, College of Public Health, Hebei  
17 University, Baoding, 071002, China

18 **\* Corresponding author:**

19 **Fei Wang** – *Faculty of Environmental Science and Engineering, Kunming University of Science and*  
20 *Technology, Kunming 650500, China; National-Regional Engineering Center for Recovery of*  
21 *Waste Gases from Metallurgical and Chemical Industries, Kunming 650500, China*

22 Email: wangfei@kust.edu.cn

23 **Lian Wang** – *Laboratory of Atmospheric Environment and Pollution Control, Research Center for*  
24 *Eco-Environmental Sciences, Chinese Academy of Sciences, Beijing 100085, China*

25 Email: lianwang@rcees.ac.cn

26 **Kai Li** – *Faculty of Environmental Science and Engineering, Kunming University of Science and*  
27 *Technology, Kunming 650500, China; National-Regional Engineering Center for Recovery of*  
28 *Waste Gases from Metallurgical and Chemical Industries, Kunming 650500, China*

29 Email: kli@kust.edu.cn

30

31 Summary of Contents:

32 Pages: 34

33 Appendix: 5

34 Figures: 18

35 Tables: 5

36

## 37 **Table of contents**

38 Appendix S1: Preparation of sorbents

39 Appendix S2: Characterization methods

40 Appendix S3: Experimental setup

41 Appendix S4: Photocatalytic performance measurement

42 Appendix S5: Bactericidal Activity Testing

43 Figure S1. Thermogravimetric (TG) and derivative thermogravimetric (DTG) curves of

44 2CuO@CN.

45 Figure S2. BJH pore size distribution of the material.

46 Figure S3. SEM micrographs of the 2CuO@CN.

47 Figure S4. Cu 2p<sub>3/2</sub> photoelectron spectra of CuO particles and 2CuO@NC.

48 Figure S5. EDS element analysis of 2CuO@CN.

49 Figure S6. Wide-survey XPS spectra of CuO particles and 2CuO@NC.

50 Figure S7. C 1s spectra of CuO particles, and 2CuO@NC

51 Figure S8. N<sub>2</sub> adsorption/desorption isotherms of De-2CuO@CN. The desorption curve is shown  
52 as a gray line.

53 Figure S9. BJH pore size distribution of De-2CuO@CN.

54 Figure S10. Wide-survey XPS spectra of 2CuO@NC and De-2CuO@NC.

55 Figure S11. O 1s photoelectron spectra of 2CuO@NC and De-2CuO@NC.

56 Figure S12. EDS mapping image of the elemental distribution of (a) C and (b) N.

57 Figure S13 .Mass of the adsorbent (a) before and (b) after adsorption.

58 Figure S14. XRD patterns of De-2CuO@CN after RhB photocatalytic degradation.

59 Figure S15. Elemental leaching amounts of Cu and P from De-2CuO@CN after RhB  
60 photocatalytic degradation measured by ICP analysis.

61 Figure S16. Photocatalytic removal of Hg<sup>0</sup> (gas) under UV light (254 nm) irradiation of De-  
62 2CuO@NC

63 Figure S17. Photographs of fluorescence microscope of *E. coli* treated with mg·L<sup>-1</sup> De-2CuO@NC  
64 samples for 30 min after stained with 3 μM propidium iodide (PI); Initial bacterial concentration  
65 1×10<sup>8</sup> CFU/mL.

66 Figure S18. Photographs of fluorescence microscope of *E. coli* treated with 15 mg·L<sup>-1</sup> De-  
67 2CuO@NC samples for 30 min after stained with 10 μM DCFH-DA. Initial bacterial concentration  
68 1×10<sup>8</sup> CFU/mL.  
69 Table S1. Physical properties of the various samples.  
70 Table S2. Physical properties of De-2CuO@CN.  
71 Table S3. Summary of photocatalyst performance in some literature reports for photocatalytic  
72 degradation of RhB  
73 Table S4. XPS elemental composition of 2CuO@CN.  
74 Table S5. H1N1 influenza virus inactivation assay results  
75

## 76 **Appendix S1: Preparation of sorbents**

77 **Materials.** Copper nitrate ( $\text{Cu}(\text{NO}_3)_2 \cdot 3\text{H}_2\text{O}$ , 99%) and urea ( $\text{CH}_4\text{N}_2\text{O}$ , 99%) were purchased from  
78 Aladdin Co. Ltd (Shanghai, China) and used as supplied. The  $\text{PH}_3$  gas was purchased from Dalian  
79 special gases Co. Ltd.  $\text{O}_2$  and  $\text{N}_2$  were obtained from Kunming Guangruida special Gases Co. Ltd.

80 **Synthesis of the CuO@NC-doped sorbents.** The typical synthesis of CuO@NC-doped sorbents  
81 is as follows:  $\text{Cu}(\text{NO}_3)_2 \cdot 3\text{H}_2\text{O}$  was mixed with  $\text{CH}_4\text{N}_2\text{O}$  together. Then, the obtained precursors  
82 were calcined in a tube furnace at  $550^\circ\text{C}$  (ramp rate:  $3^\circ\text{C}/\text{min}$ ) for 3 h under an air atmosphere.  
83 The sorbent was designed as CuO@NC. The comparison samples were similarly synthesized  
84 except for the different content of  $\text{Cu}(\text{NO}_3)_2 \cdot 3\text{H}_2\text{O}$  in the raw materials, and they are named  
85 1CuO@NC, 2CuO@NC, 3CuO@NC, 4CuO@NC, and CuO particles according to the mass ratio of  
86  $\text{Cu}(\text{NO}_3)_2 \cdot 3\text{H}_2\text{O}$ :  $\text{CH}_4\text{N}_2\text{O}$  (1:6, 2:6, 3:6, 4:6, and 4:0), respectively.

87

## 88 **Appendix S2: Characterization methods**

89 The specific surface area was calculated using the Brunauer–Emmett–Teller (BET) method  
90 using a surface area analyzer (BELSORP-max, MicrotracBEL, Japan) at the temperature of liquid  
91 nitrogen (77 K). Before the analysis, all samples were degassed at 473 K for 3 h. The BET surface  
92 area, total pore volume, and pore size distribution were calculated using adsorption/desorption  
93 isotherms. Horvath-Kawazoe (HK) method and Barrett-Joyner-Halenda (BJH) method were used  
94 to calculate the pore size distribution, the total pore volume ( $V_{total}$ ), and the mesopore volume  
95 ( $V_{mes}$ ), and the micropore volume ( $V_{mic}$ ) of the sorbents. The reaction process was investigated  
96 by in situ IR spectroscopy using an infrared spectrophotometer (Thermo Scientific Nicolet Is 50,  
97 USA). The sample (~0.05 g) was placed into a pot with a diluted amount of reactant and with a  
98 heating cartridge that allowed the samples to be heated to the desired temperature (~80°C). All  
99 the spectra acquired were accumulated over 16 scans performed with a resolution of 4 cm<sup>-1</sup>. The  
100 x-ray diffraction (XRD) patterns were obtained using an X-ray diffractometer (Rigaku Miniflex  
101 600) equipped with Ni-filtered Cu K $\alpha$  radiation( $\lambda=0.15406$  nm) opening at a scan rate of 5° min<sup>-1</sup>  
102 from  $2\theta = 10\text{--}90^\circ$ . The identification of the crystalline phases was performed by matching the  
103 samples with JCPDS files, and the crystallinity was calculated using MDI Jade 6.0. The X-ray  
104 Photoelectron Spectroscopy (XPS) (K-alpha+, Thermo Fisher Scientific) analysis was performed  
105 using Al K $\alpha$  radiation, where the energy of the Al target power was at 72 W. The Fourier transform  
106 infrared (FT-IR) analysis was carried out using an infrared spectrophotometer (Thermo Scientific  
107 Nicolet Is 50, USA). The instrument was scanned 32 times over a test range of 400–4000 cm<sup>-1</sup>,  
108 and the resolution of the instrument was 4 cm<sup>-1</sup>. Thermogravimetric (TG-DTG) curves were  
109 carried out on a METTLER TOLEDO TGA analyzer. The uncalcined precursor was heated up to  
110 temperatures of 800 °C at a heating rate of 5°C min<sup>-1</sup> with an N<sub>2</sub> flow. Raman spectra were  
111 collected on a Renishaw inVia instrument confocal Raman microscope using a 633 nm laser at 5  
112 mW, and a 50x objective, by accumulating 5 scans, with an integration time of 10 s. The surface  
113 morphologies and microstructures of the samples were observed with scanning electron  
114 microscopy (SEM) (Zeiss Gemini 300) equipped with an EDS system, operating at 3.00 kV. The  
115 morphology and structure of the materials were characterized by a transmission electron  
116 microscope (JEM-2100 plus, JEOL, Japan) operated at an accelerating voltage of 200 kV.

117 Moreover, the hydrogen temperature-programmed reduction ( $\text{H}_2$ -TPR) experiments were  
118 performed using AutoChem1 II 2920 equipment under the conditions of 10 vol%  $\text{H}_2$ /Ar flow, and  
119  $10^\circ\text{C}\cdot\text{min}^{-1}$ . Electron paramagnetic resonance (EPR) spectra were recorded on an EMXmicro  
120 (Burker, Germany) spectrometer at ambient temperature. The photoelectrochemical (PEC)  
121 measurements were performed on a CHI 660E electrochemical workstation (CHI Inc., USA) at  
122 ambient temperature. Transient photocurrents measurement was recorded under intermittently  
123 visible light irradiation ( $\lambda > 420\text{ nm}$ ). Photoluminescence (PL) experiments were tested by a  
124 transient fluorescence spectrophotometer (Edinburgh Instruments, EI, FLS1000).  $\text{Cu}_3\text{P}$  was  
125 dispersed into varying concentrations within deionized water and subjected to mechanical  
126 stirring at a temperature of  $25^\circ\text{C}$  to ensure a homogeneous suspension. At predetermined time  
127 intervals of 10 minutes and 30 minutes post-dispersion, a 1 mL aliquot of the suspension was  
128 extracted and centrifuged to separate the solid nanoparticles from the supernatant. The  
129 supernatant was then analyzed for the dissolution of  $\text{Cu}^{2+}$  using a PerkinElmer Optima 8300  
130 Inductively Coupled Plasma Optical Emission Spectrometer (ICP-OES). The PerkinElmer Optima  
131 8300 ICP-OES is a state-of-the-art analytical instrument designed for the simultaneous  
132 determination of multiple elements.

133

### 134 Appendix S3: Experimental setup

135 The sorbents performance test system is shown in Fig. S1. The tests for sorbent performance  
136 were carried out in a custom quartz tube fixed-bed reactor (135 mm length  $\times$  6 mm insider  
137 diameter). Before evaluating the  $\text{PH}_3$  removal performance of the sorbents, a pre-cleaning with  
138  $\text{N}_2$  was performed at  $100^\circ\text{C}$  for 30 min to remove the adsorbed water from the surface of the  
139 sorbents.  $\text{PH}_3$  from the gas cylinder was diluted with  $\text{N}_2$  (99.99%) to the required concentrations  
140 (1%  $\text{O}_2$ ,  $C(\text{PH}_3)$ : 1000 ppm/1517.86  $\text{mg m}^{-3}$ ,  $\pm 5\%$ ), which is a typical  $\text{O}_2$  and  $\text{PH}_3$  concentration  
141 measured in the yellow phosphorus tail gas. In this study, the total flow rate ( $Q$ ) and the mass of  
142 sorbent were fixed at  $100 \text{ mL min}^{-1}$  and 0.3 g, which corresponded to a weight hourly space  
143 velocity ( $WHSV$ ) of  $20\,000 \text{ mL h}^{-1} \text{g}_{\text{sorbent}}^{-1}$ . Use an electric tracing ribbon to keep the reactor  
144 temperature ( $T$ ) at  $90^\circ\text{C}$ . The  $\text{PH}_3$  concentrations in the inlet and outlet gases of the reactor were  
145 determined using an online 9790 II gas chromatograph. The  $\text{PH}_3$  concentration was measured  
146 every 20 min until the  $\text{PH}_3$  concentration in the outlet gas reached 30 ppm. Experiments on each  
147 sorbent were repeated twice to assess the reliability of the data collected. The removal efficiency  
148 and  $\text{PH}_3$  breakthrough capacity are defined in Equations 1 and 2, respectively. Note that the  
149 breakthrough capacity is defined as when the removal efficiency is 97%.

$$150 \quad \text{PH}_3 \text{ removal efficiency (\%)} = \frac{C_{\text{inlet}} - C_{\text{outlet}}}{C_{\text{inlet}}} \times 100 \quad (1)$$

$$151 \quad \text{PH}_3 \text{ breakthrough capacity (mg(PH}_3\text{) g}_{\text{sorbent}}^{-1})} = \frac{Q \int_0^t (C_{\text{inlet}} - C_{\text{outlet}}) dt}{m} \quad (2)$$

152 Where  $C_{\text{inlet}}$  and  $C_{\text{outlet}}$  are the  $\text{PH}_3$  concentration in the inlet gas and outlet gas ( $\text{mg m}^{-3}$ ),  $m$  is the  
153 mass of fresh sorbents (0.3 g), and  $t$  is the reaction time (min), and  $Q$  is the total flow rate (100  
154  $\text{mL min}^{-1}$ ).

155



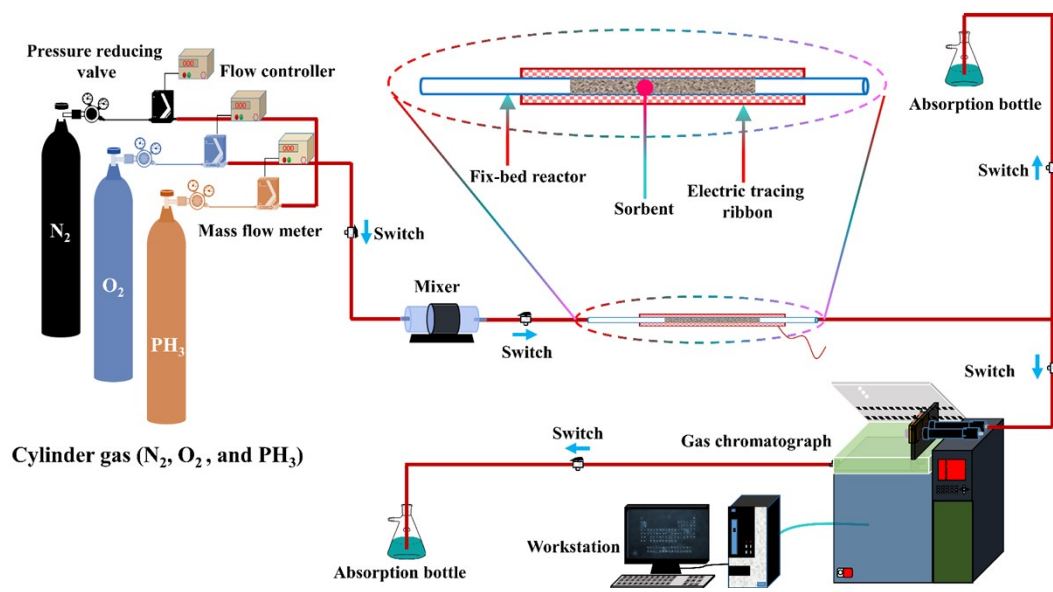

**Scheme S1.** Adsorption–oxidation performance test system.

## 159 **Appendix S4: Photocatalytic performance measurement**

### 160 **Photocatalytic removal of Hg<sup>0</sup>**

161 The simulated gas was first mixed with ~2% O<sub>2</sub> and 1100 ± 100 µg m<sup>-3</sup> Hg<sup>0</sup>(gas) (N<sub>2</sub> balance)  
162 and then introduced into a fixed bed reactor. The photocatalytic removal efficiency of Hg<sup>0</sup>(gas)  
163 was evaluated at room temperature, in which each group of 50 mg catalyst was added into a  
164 quartz tube exposed to 1100 ± 100 µg m<sup>-3</sup> Hg<sup>0</sup>(gas) (N<sub>2</sub> balance) at the flow intake rate of 400 mL  
165 min<sup>-1</sup> (GHSV=480 000 mL h<sup>-1</sup>g<sub>catalyst</sub><sup>-1</sup>). During adsorption, the catalyst was irradiated with UV light  
166 (254 nm, 3 mW cm<sup>-2</sup>, Philips) and then swept with He gas at 50°C for 30 min to remove the  
167 physically adsorbed oxygen. Adsorption saturation was achieved when the light was turned off.  
168 The experiment was then initiated and stopped when the reaction removal efficiency reached  
169 saturation. The concentration of Hg<sup>0</sup>(gas) was measured using a QM201 fluorescent mercury  
170 meter, and the final removal efficiency was calculated by using the following formula:

$$171 \quad \text{Hg}^0(\text{gas}) \text{ removal efficiency (\%)} = \frac{C_{\text{inlet}} - C_{\text{outlet}}}{C_{\text{inlet}}} \times 100$$

172 where  $C_{\text{inlet}}$  and  $C_{\text{outlet}}$  are the Hg<sup>0</sup>(gas) concentrations in the inlet gas and outlet gas (µg m<sup>-3</sup>),  
173 respectively, and  $Q$  is the total flow rate (400 mL min<sup>-1</sup>).

### 174 **Photocatalytic degradation of Rhodamine B (RhB)**

175 First, 50 mg catalyst was added to 50 mL rhodamine B (RhB) solution at a concentration of 40  
176 mg/L and magnetically stirred for 60 min under dark conditions to achieve adsorption and  
177 desorption equilibrium. Next, a 500 W xenon lamp with a 420 nm cut-off filter was used as the  
178 visible light source, and a circulating cooling system was used to control the reaction temperature  
179 at 25°C. During the photocatalytic reaction, 3 mL of the suspension was collected every 15 min  
180 and centrifuged at 5000 rpm for 3 min to obtain the supernatant. The photocatalytic degradation  
181 efficiency of RhB was measured at 554 nm using a UV-vis spectrophotometer.

182

## 183 **Appendix S5: Bactericidal activity testing**

### 184 ***E. coli* inactivation assay**

185 Single colonies of *E. coli* (ATCC 25922) cultured on LB solid medium were selected and  
186 incubated at 37 °C in LB liquid medium for 12 h, then centrifuged and washed twice to collect *E.*  
187 *coli*, which was then dispersed into deionized water to obtain about 10<sup>8</sup> CFU/mL *E. coli*. Next, the  
188 De-2CuO@NC powder with different quality was added into *E. coli* suspension to form various  
189 concentration of De-2CuO@NC (5,10,15 mg·L<sup>-1</sup>). The mixture was stirred with a magnetic stirrer  
190 at 25 °C. At the time intervals of 10 min and 30 min after De-2CuO@NC addition, 0.5 mL of  
191 bacterial suspension was withdrawn and immediately diluted 10-fold in series with 4.5 mL  
192 deionized water and plated on LB agar plates. All plates were cultured at 37 °C for 12 h and viable  
193 cell counts were determined using standard plate counting method. All experiments were  
194 repeated in triplicate.

### 195 **H1N1 Influenza virus inactivation experiment**

196 The effect of De-2CuO@NC on virus was examined at GUANGDONG DETECTION CENTER OF  
197 MICROBIOLOGY, China. First, the virus suspension (Influenza A virus, H1N1 A/PR/8/34, ATCC CR-  
198 1469) was added to cell culture plate to infect MDCK cell. The cell suspension was added to the  
199 wells of a 96-well plate and cultured for 24 h (5% CO<sub>2</sub>, 37 °C) for complete attachment, followed  
200 by the virus suspension added and laid aside at 37 °C for 1-2 h. Subsequently, after removing the  
201 original culture medium and rinsing with PBS three times, culture was conducted in 5% CO<sub>2</sub>  
202 atmosphere at 37 °C for 1 h. Finally, the virus suspension in the cell culture plate was removed.  
203 After culturing for another 24 h, the virus infection of MDCK cells was observed and recorded by  
204 using an inverted fluorescence microscope. 100 µL of virus stock solution was dropped into the  
205 De-2CuO@NC suspension (15 mg·L<sup>-1</sup>), then shaken in a shaker for 30 min, followed by virus titer  
206 test (TCID<sub>50</sub> method) and incubated in 5% CO<sub>2</sub> atmosphere at 34 °C for 7 days. Finally, cell lesions  
207 were observed and virus titers were calculated. Deionized water was used for positive control.  
208 Cell culture medium was used as a negative control, confirming the culture medium used was  
209 not contaminated and the cells were growing well.

## 210 **The oxidation performance of De-2CuO@NC**

211 In order to examine the oxidation performance of De-2CuO@NC such as lipid peroxidation  
212 towards *E. coli* cells, the concentration of malondialdehyde (MDA) in *E. coli* suspension treated  
213 with De-2CuO@NC for 30 min was tested with Tongren chemical kit.

## 214 **Cytotoxicity assays**

215 De-2CuO@NC was dispersed into suspension using sterilized deionized water, and Hela cells  
216 were cultured in Dulbecco's Modified Eagle Medium (DMEM) media overnight in 96-well plates.  
217 The culture media was removed and washed twice with PBS. The final ratio of DMEM media and  
218 suspension was 9:1 ( $15 \text{ mg}\cdot\text{L}^{-1}$ ), the mixture was added to 96-well plate and incubated for 24 h,  
219 the media was removed and washed twice with PBS, and the Cell Counting Kit-8 (CCK8) and  
220 DMEM media were mixed at the ratio of 1:9 and incubated for 2 h, and the absorbance was  
221 detected at 405 nm wavelength on a microplate reader.

222

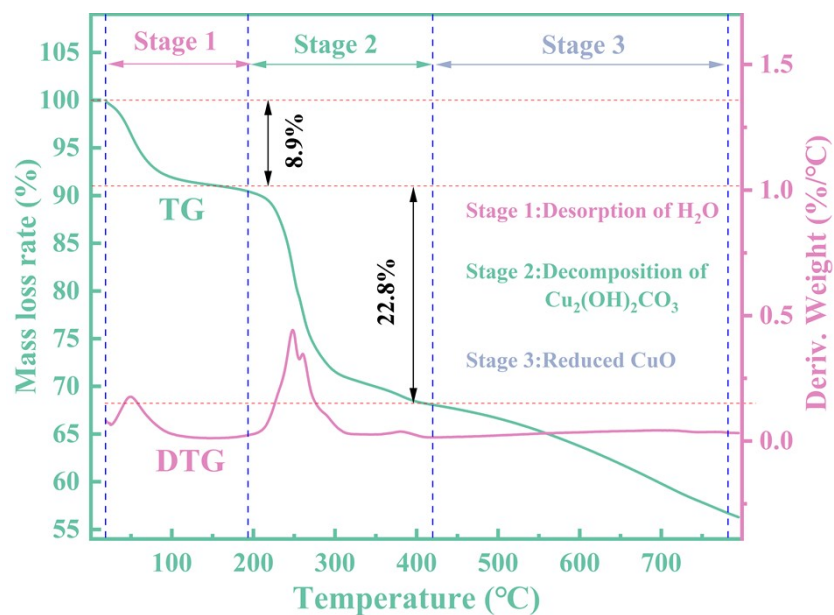

223  
 224 **Figure S1.** Thermogravimetric (TG) and derivative thermogravimetric (DTG) curves of  
 225 2CuO@CN.  
 226

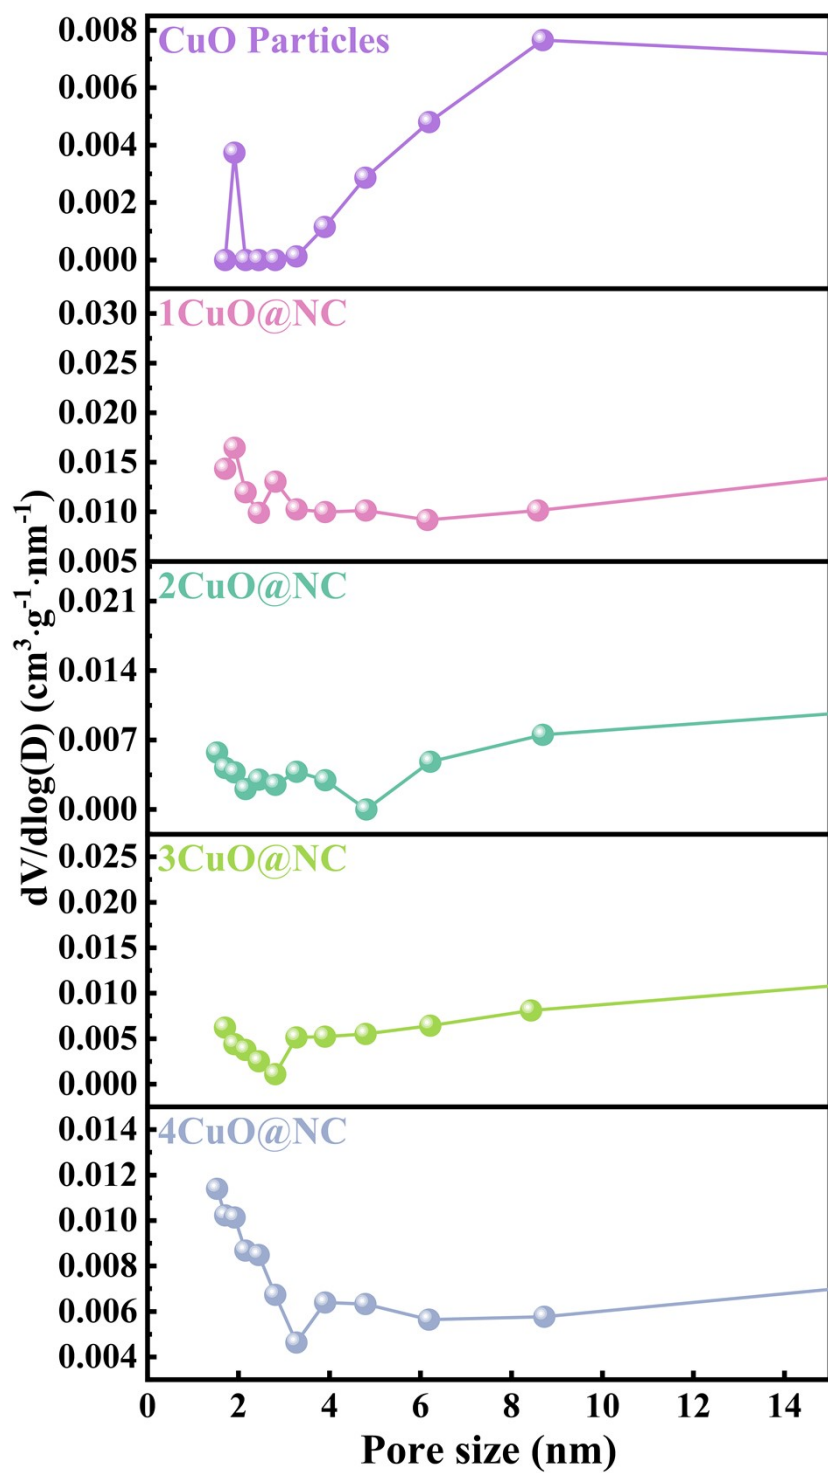

**Figure S2.** BJH pore size distribution of the material.

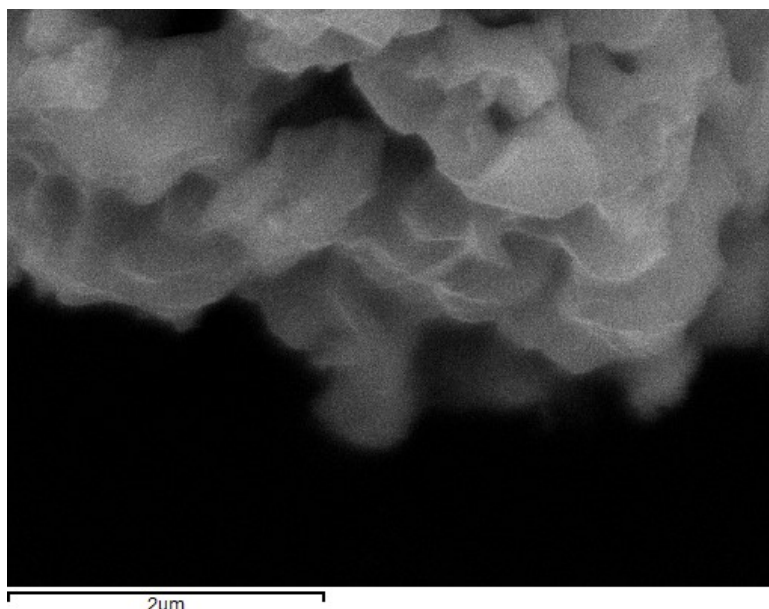

230

231 **Figure S3.** SEM micrographs of the 2CuO@CN.

232

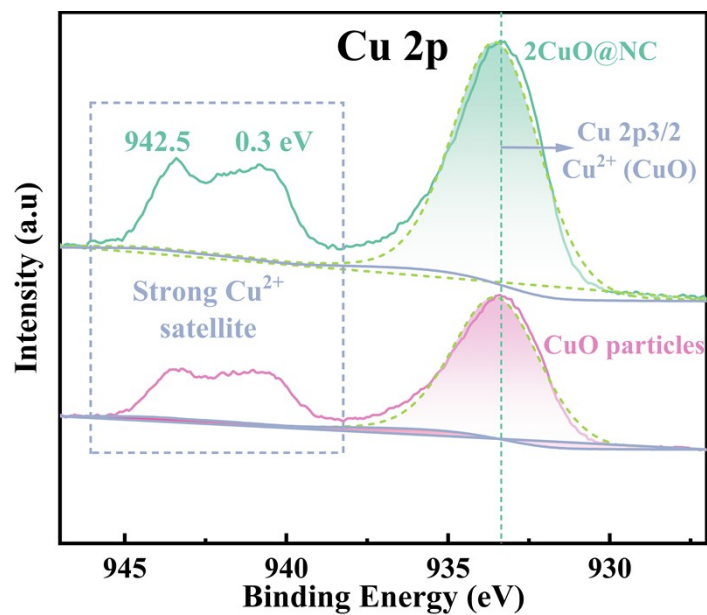

233

234 **Figure S4.** Cu 2p<sub>3/2</sub> photoelectron spectra of CuO particles and 2CuO@NC.

235



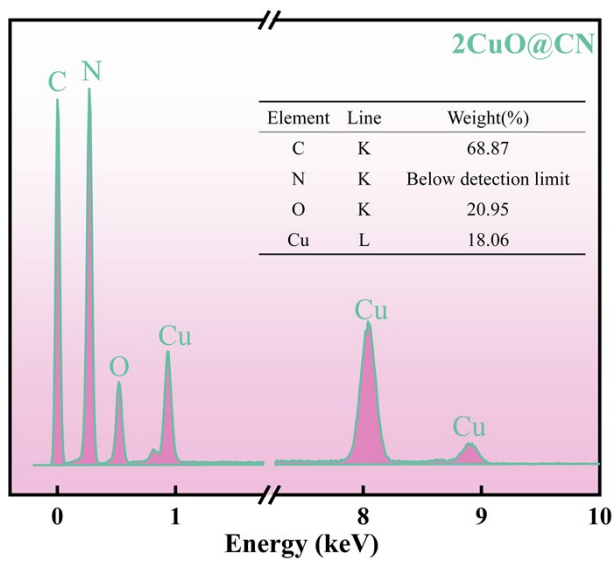

236

237 **Figure S5.** EDS element analysis of 2CuO@CN.

238

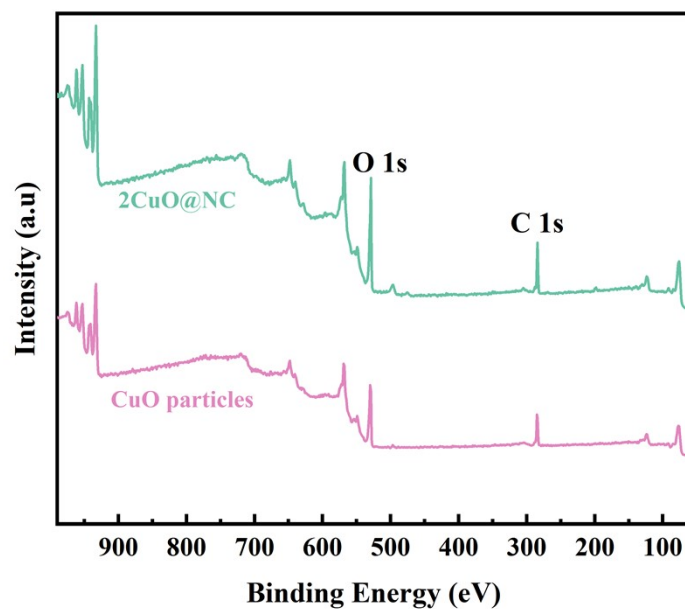

239

240 **Figure S6.** Wide-survey XPS spectra of CuO particles and 2CuO@NC.

241

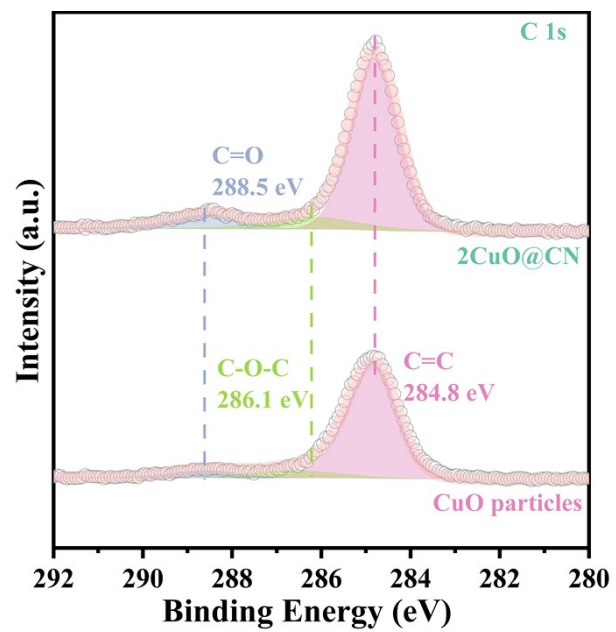

**Figure S7.** C 1s spectra of CuO particles, and 2CuO@NC

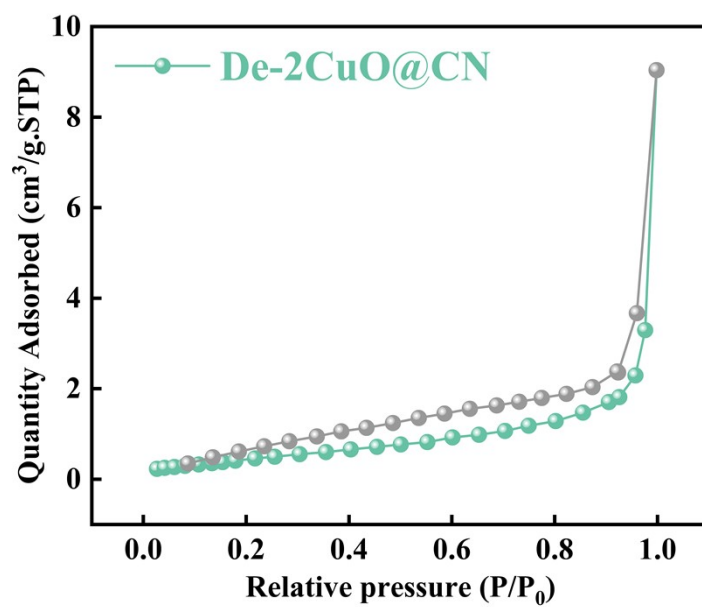

245  
 246 **Figure S8.**  $\text{N}_2$  adsorption/desorption isotherms of De-2CuO@CN. The desorption curve is shown  
 247 as a gray line.  
 248

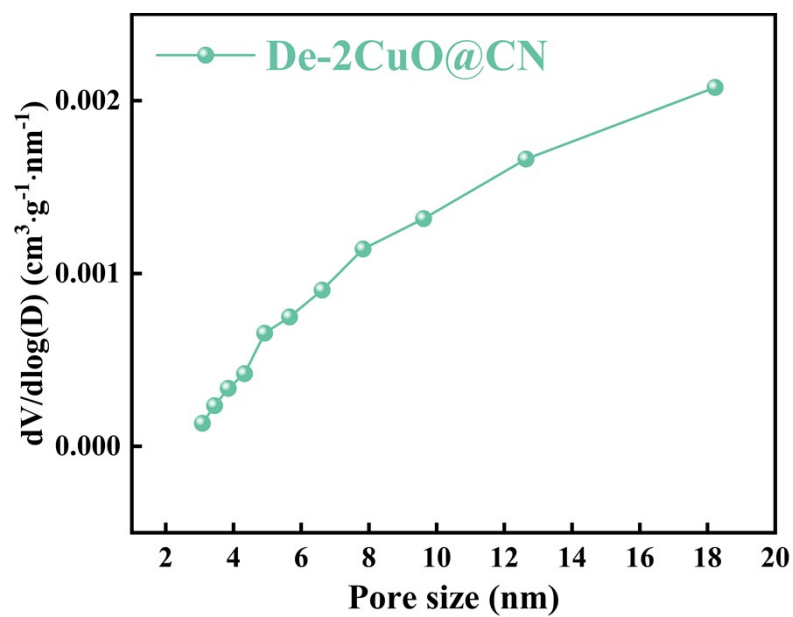

249  
250 **Figure S9.** BJH pore size distribution of De-2CuO@CN.

251

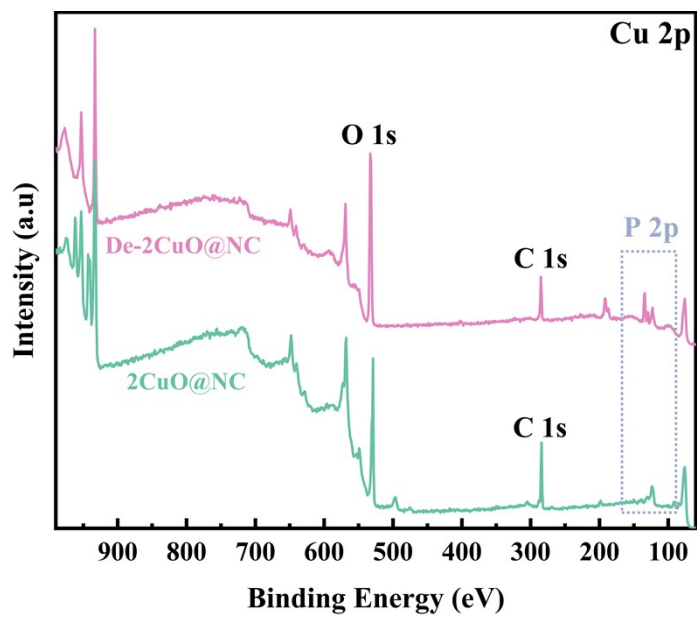

252

253 **Figure S10.** Wide-survey XPS spectra of 2CuO@NC and De-2CuO@NC.

254

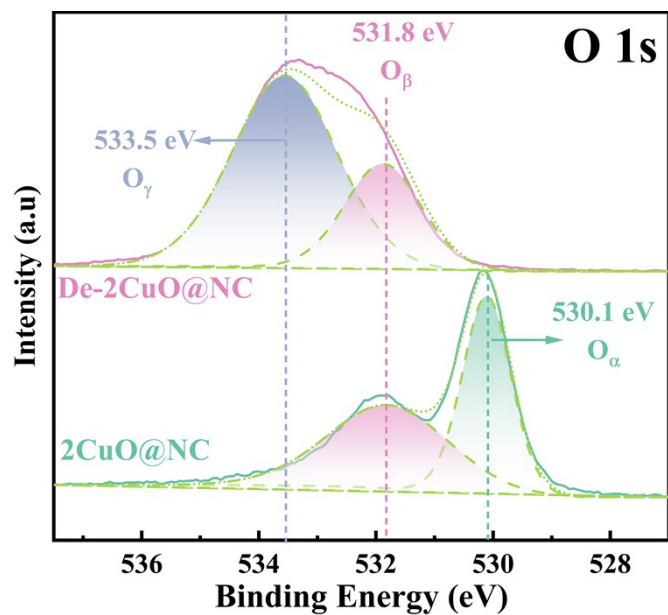

255

256 **Figure S11.** O 1s photoelectron spectra of 2CuO@NC and De-2CuO@NC.

257

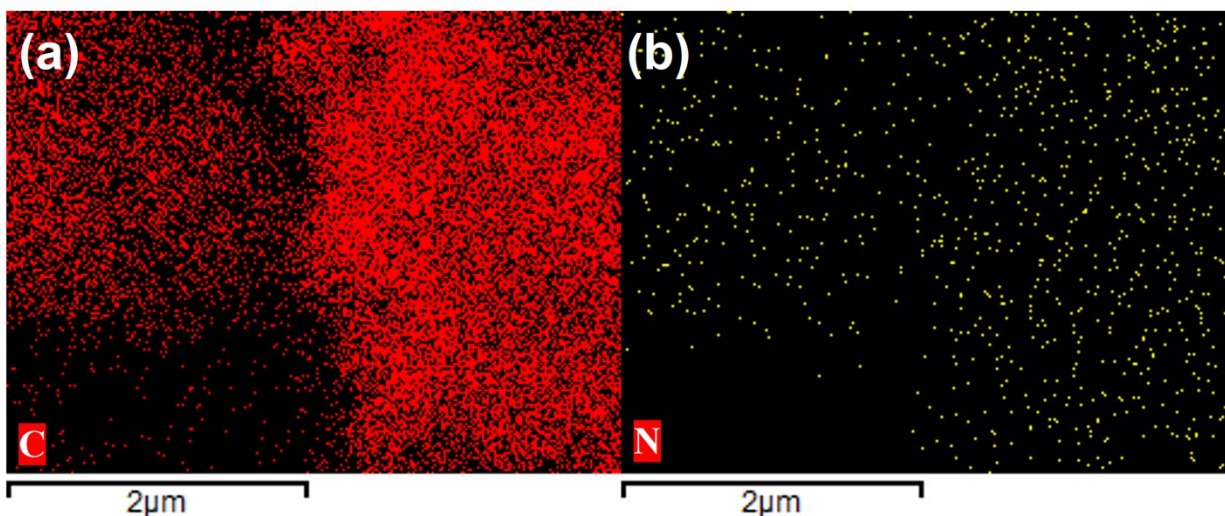

258

259 **Figure S12.** EDS mapping image of the elemental distribution of (a) C and (b) N.



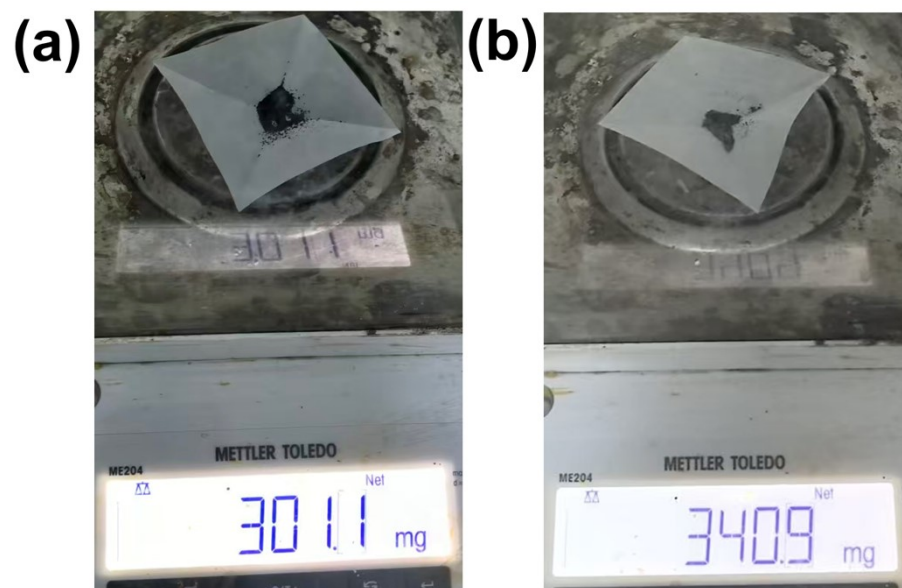

260

261 **Figure S13.** Mass of the adsorbent (a) before and (b) after adsorption.

262

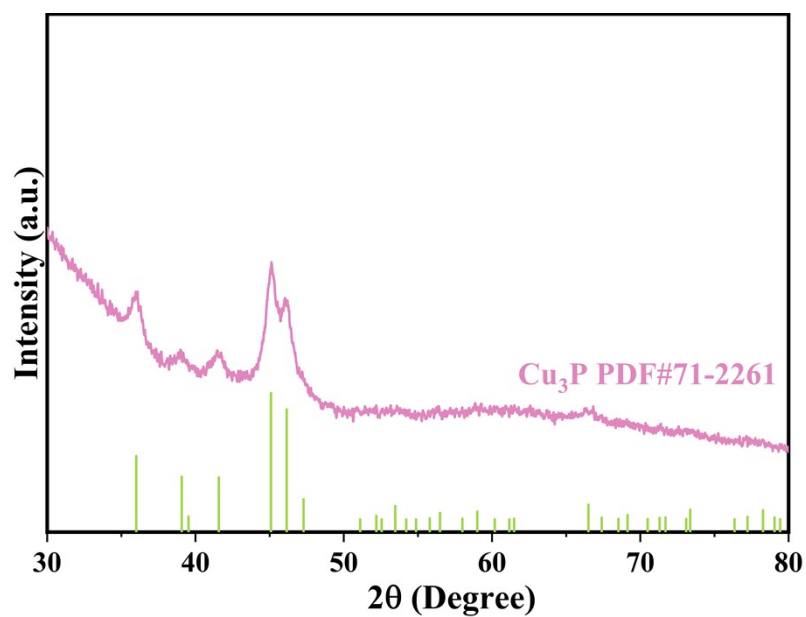

263

264 **Figure S14.** XRD patterns of De-2CuO@CN after RhB photocatalytic degradation.

265

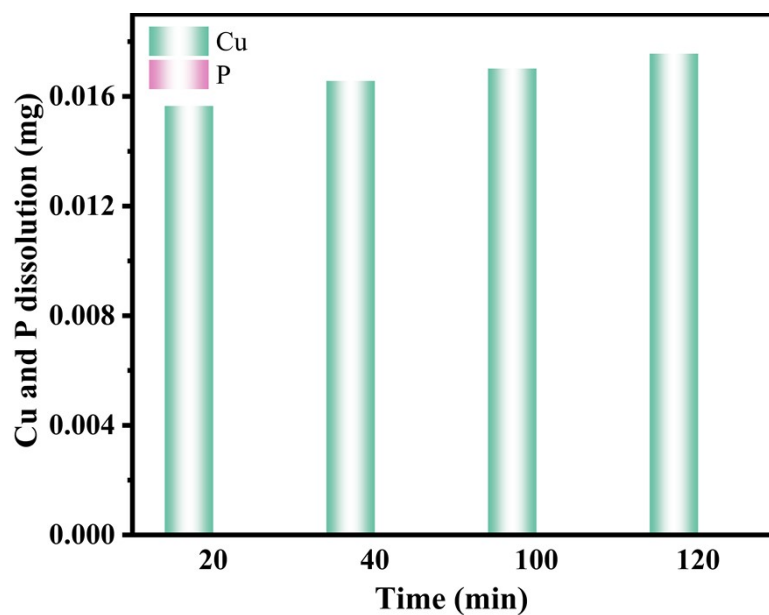

266

267 **Figure S15.** Elemental leaching amounts of Cu and P from De-2CuO@CN after RhB

268 photocatalytic degradation measured by ICP analysis.

269

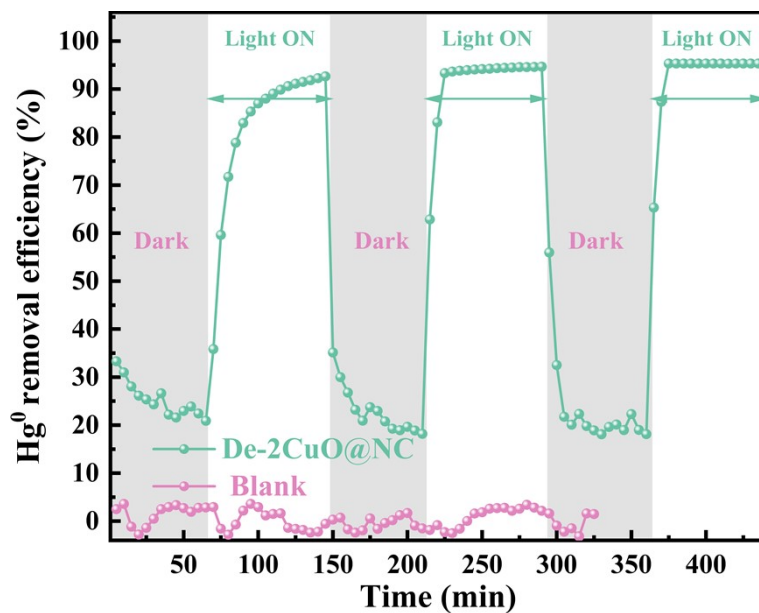

270

271 **Figure S16.** Photocatalytic removal of  $\text{Hg}^0$  (gas) under UV light (254 nm) irradiation of De-

272 2CuO@NC

273

274

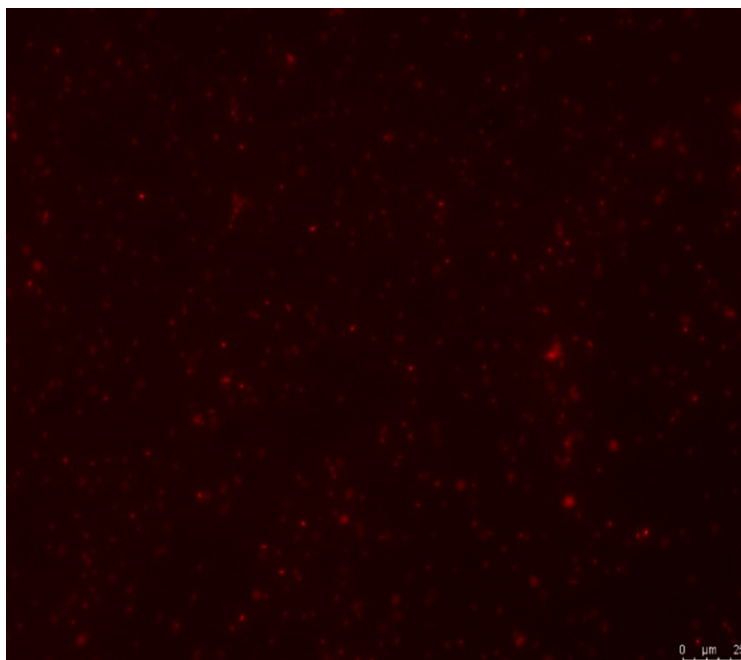

275

276 **Figure S17.** Photographs of fluorescence microscope of *E. coli* treated with  $\text{mg}\cdot\text{L}^{-1}$  De-2CuO@NC  
277 samples for 30 min after stained with  $3\text{ }\mu\text{M}$  propidium iodide (PI); Initial bacterial concentration  
278  $1\times 10^8$  CFU/mL.

279

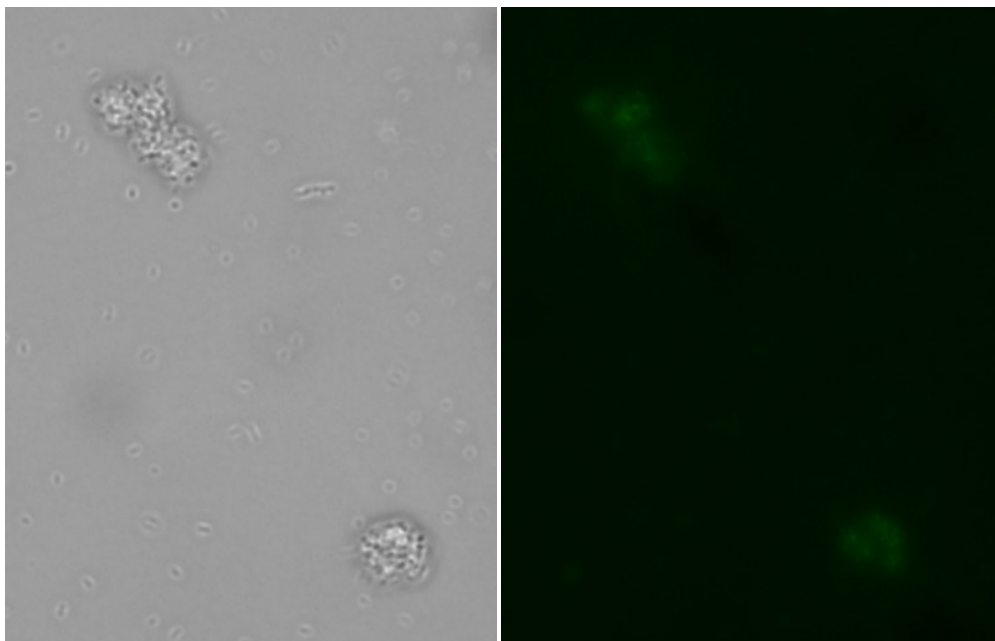

280

281 **Figure S18.** Photographs of fluorescence microscope of *E. coli* treated with  $15 \text{ mg} \cdot \text{L}^{-1}$  De-  
282  $2\text{CuO@NC}$  samples for 30 min after stained with  $10 \mu\text{M}$  DCFH-DA. Initial bacterial concentration  
283  $1 \times 10^8 \text{ CFU/mL}$ .

284

285 **Table S1.** Physical properties of the various samples.

| Sample  | $S$ (m <sup>2</sup> g <sup>-1</sup> ) | $V_{total}$ (cm <sup>3</sup> g <sup>-1</sup> ) | $D$ (nm) |
|---------|---------------------------------------|------------------------------------------------|----------|
| CuO     | 0.95                                  | 0.01                                           | 12.3     |
| 1CuO@NC | 9.7                                   | 0.04                                           | 8.1      |
| 2CuO@NC | 7.1                                   | 0.03                                           | 7.5      |
| 3CuO@NC | 6.3                                   | 0.03                                           | 9.6      |
| 4CuO@NC | 5.6                                   | 0.02                                           | 7.2      |

286

287 **Table S2.** Physical properties of De-2CuO@CN.

| Sample     | $S$ (m <sup>2</sup> g <sup>-1</sup> ) | $V_{total}$ (cm <sup>3</sup> g <sup>-1</sup> ) | $D$ (nm) |
|------------|---------------------------------------|------------------------------------------------|----------|
| De-2CuO@NC | 1.94                                  | 0.014                                          | 3.1      |

288

289

290 **Table S3.** Summary of photocatalyst performance in some literature reports for photocatalytic  
 291 degradation of RhB.

| Catalyst                                              | Light                | Concentration               | Solution volume | Performance             | Ref.             |
|-------------------------------------------------------|----------------------|-----------------------------|-----------------|-------------------------|------------------|
| TiO <sub>2</sub> /MMT                                 | Sunlight             | 10 ppm                      | 100 mL          | 200 min<br>90%          | [1]              |
| graphene–ZnO                                          | Sunlight             | 10 mg/L                     | 100 mL          | 140min<br>100%          | [2]              |
| MCM-glypy-Mo                                          | Visible light        | 20 ppm                      | 150 mL          | 120min<br>100%          | [3]              |
| TiO <sub>2</sub> nanotubes                            | Visible light        | 16 mg·L <sup>-1</sup>       | 200 mL          | 140 min<br>94.86%       | [4]              |
| Anatase TiO <sub>2</sub><br>Nanowires                 | UV light             | 23 mg·L <sup>-1</sup>       | 10 mL           | 50 min<br>100%          | [5]              |
| MoP QDs (PMO-5)                                       | Visible light        | 50 mg/L                     | 50 mL           | 40 min<br>97%           | [6]              |
| P-doped porous g-C <sub>3</sub> N <sub>4</sub>        | Visible light        | 20 mg/L                     | 200 mL          | 70 min<br>99.5%         | [7]              |
| Ag <sub>3</sub> PO <sub>4</sub> /NG/P <sub>3</sub> HT | Visible light        | 10 mg/L                     | 50 mL           | 32 min<br>95%           | [8]              |
| Ag <sub>3</sub> PO <sub>4</sub>                       | Visible light        | 20 mg/L                     | 200 mL          | 21 min<br>95%           | [9]              |
| <b>De-2CuO@NC</b>                                     | <b>Visible light</b> | <b>50 mg·L<sup>-1</sup></b> | <b>50 mL</b>    | <b>120 min<br/>100%</b> | <b>This work</b> |

292  
 293



294 **Table S4.** XPS elemental composition of 2CuO@CN.

| Name | Area      | Atomic (%) |
|------|-----------|------------|
| C1s  | 56512.99  | 32.95      |
| Cu2p | 670763.72 | 26.25      |
| O1s  | 155021.94 | 37.33      |
| N1s  | 2535.67   | 0.96       |

295

296 **Table S5.** H1N1 influenza virus inactivation assay results

| Virus and host cell                                               | Action concentration and time   | Group           | Logarithm of infectivity titre value (lgTCID <sub>50</sub> /mL) | Average logarithm of infectivity titre value (lgTCID <sub>50</sub> /mL) | Infectivity titre virus value(TC D <sub>50</sub> /mL) | Average infectivity titre virus value(TC D <sub>50</sub> /mL) | Virus inactivation ratio(%) |
|-------------------------------------------------------------------|---------------------------------|-----------------|-----------------------------------------------------------------|-------------------------------------------------------------------------|-------------------------------------------------------|---------------------------------------------------------------|-----------------------------|
| Influenza A virusH1N1:AVPR/8/34 (ATCC VR-1469)<br>Host cell: MDCK | 15 mg·L <sup>-1</sup><br>30 min | Control group 1 | 5.43                                                            |                                                                         |                                                       |                                                               |                             |
|                                                                   |                                 | Control group 2 | 5.50                                                            | 5.42                                                                    | 2.66*10 <sup>5</sup>                                  |                                                               |                             |
|                                                                   |                                 | Control group 3 | 5.33                                                            |                                                                         |                                                       | 1.03                                                          | 90.68                       |
|                                                                   |                                 | Test group 1    | 4.33                                                            |                                                                         |                                                       |                                                               |                             |
|                                                                   |                                 | Test group 2    | 4.50                                                            | 4.39                                                                    | 2.48*10 <sup>4</sup>                                  |                                                               |                             |
|                                                                   |                                 | Test group 2    | 4.33                                                            |                                                                         |                                                       |                                                               |                             |

Cells in the negative control group grew well, the results met all the requirements of the evaluation criteria.

297

## 298 REFERENCE

- 299 [1] T.B.T. Dao, T.T.L. Ha, T.D. Nguyen, H.N. Le, C.N. Ha-Thuc, T.M.L. Nguyen, P. Perre, D.M.  
300 Nguyen, *Chemosphere* 2021, **280**, 130802.
- 301 [2] G.M. Neelgund, A. Oki, Z. Luo, *J. Colloid Interface Sci.* 2014, **430**, 257-264.
- 302 [3] N.U. Silva, T.G. Nunes, M.S. Saraiva, M.S. Shalamzari, P.D. Vaz, O.C. Monteiro, C.D. Nunes,  
303 *Appl. Catal. B Environ.* 2012, **113**: 180-191.
- 304 [4] Y.L. Pang, A.Z. Abdullah, S. Bhatia, , *Chem. Eng. J.* 2011, **166**, 873-880.
- 305 [5] H.B. Wu, H.H. Hng, X.W. Lou, *Adv. Mater.*, 2012, **24**, 2567-2571.
- 306 [6] Y. Huang, W. Xing, L. Zhou, B. Tian, J. Zhang, Y. Zhou, *Res. Chem. Intermed.* 2022, **48**, 2887.
- 307 [7] Z. Li, Q. Chen, Q. Lin, Y. Chen, X. Liao, H. Yu, C. Yu, *J. Taiwan Inst. Chem. Eng.* 2020, **114**, 249.
- 308 [8] Y. Zhang, C. Xie, F. L. Gu, H. Wu, Q. Guo, *J. Hazard. Mater.* 2016, **315**, 23.
- 309 [9] J. Ma, Q. Liu, L. Zhu, J. Zou, K. Wang, M. Yang, S. Komarneni, *Appl. Catal. B: Environ.* 2016, **182**,  
310 26.
- 311
